# Supplementary material for: High-efficiency solution-processed light-emitting diode based on a phosphorescent Ag3Cu5 cluster complex
Source: Royal Society of Chemistry journal article supplement (doi:10.1039/d1tc00305d), 2021-01-01
Supplement: d1tc00305d1.pdf [file d1tc00305d1.pdf]

# Electronic Supporting Information

## High-efficiency Solution-processed Light-emitting Diode Based on a Phosphorescent Ag<sub>3</sub>Cu<sub>5</sub> Cluster Complex

Zhu Jiao,<sup>ab</sup> Ming Yang,<sup>\*b</sup> Jin-Yun Wang,<sup>b</sup> Ya-Zi Huang,<sup>b</sup> Pei Xie,<sup>a,b</sup> Zhong-Ning Chen<sup>\*abc</sup>

<sup>a</sup> College of Chemical Engineering, Fuzhou University, Fuzhou, Fujian 350108, China

<sup>b</sup> State Key Laboratory of Structural Chemistry, Fujian Institute of Research on the Structure of Matter, Chinese Academy of Sciences, Fuzhou, Fujian 350002, China. Email: [czn@fjirsm.ac.cn](mailto:czn@fjirsm.ac.cn), [ym31023@fjirsm.ac.cn](mailto:ym31023@fjirsm.ac.cn)

<sup>c</sup> Fujian Science & Technology Innovation Laboratory for Optoelectronic Information of China, Fuzhou, Fujian 350108, China

**Table S1.** Crystal Data and Structure Refinement for Ag<sub>3</sub>Cu<sub>5</sub> Cluster Complex.

|                               | Ag <sub>3</sub> Cu <sub>5</sub> Cluster                                                                                        |
|-------------------------------|--------------------------------------------------------------------------------------------------------------------------------|
| chemical formula              | C <sub>255</sub> H <sub>239</sub> N <sub>9</sub> P <sub>6</sub> Ag <sub>3</sub> Cu <sub>5</sub> Cl <sub>2</sub> O <sub>8</sub> |
| formula weight                | 4455.57                                                                                                                        |
| crystal system                | Triclinic                                                                                                                      |
| space group                   | $P \bar{1}$                                                                                                                    |
| $T$ (k)                       | 273 (2)                                                                                                                        |
| $a$ (Å)                       | 15.479 (2)                                                                                                                     |
| $b$ (Å)                       | 15.967 (2)                                                                                                                     |
| $c$ (Å)                       | 54.448 (6)                                                                                                                     |
| $\alpha$ (°)                  | 83.158 (5)                                                                                                                     |
| $\beta$ (°)                   | 89.009 (4)                                                                                                                     |
| $\gamma$ (°)                  | 75.683 (6)                                                                                                                     |
| $V$ (Å <sup>3</sup> )         | 12943.32 (3)                                                                                                                   |
| $Z$                           | 2                                                                                                                              |
| density (g/cm <sup>3</sup> )  | 1.143                                                                                                                          |
| reflns collected              | 196725                                                                                                                         |
| unique reflns                 | 47348                                                                                                                          |
| $R_{\text{int}}$              | 0.171                                                                                                                          |
| $F(000)$                      | 4612                                                                                                                           |
| $R_1^a$ [ $I > 2\sigma(I)$ ]  | 0.082                                                                                                                          |
| $wR_2^b$ [ $I > 2\sigma(I)$ ] | 0.261                                                                                                                          |
| GOF                           | 1.01                                                                                                                           |

<sup>a</sup> $R_1 = \Sigma||F_o| - |F_c|| / \Sigma|F_o|$ ,    <sup>b</sup> $wR_2 = [\Sigma w(|F_o| - |F_c|)^2 / \Sigma w|F_o|^2]^{1/2}$ .

**Table S2.** Selected Interatomic Distances (Å) and Bond Angles (°) of Ag<sub>3</sub>Cu<sub>5</sub> Cluster Complex.

|               |            |               |            |
|---------------|------------|---------------|------------|
| Ag1–Cu1       | 2.6379(10) | Ag1–Cu2       | 2.6529(11) |
| Ag2–Cu1       | 2.6616(11) | Ag2–Cu3       | 2.6485(10) |
| Ag3–Cu2       | 2.6702(11) | Ag3–Cu3       | 2.6818(9)  |
| Cu1–Cu4       | 2.5555(12) | Cu1–Cu5       | 2.5928(12) |
| Cu2–Cu4       | 2.6269(11) | Cu2–Cu5       | 2.5346(11) |
| Cu3–Cu4       | 2.5248(13) | Cu5–Cu3       | 2.5956(13) |
| Cu4–Cu5       | 2.6979(12) | Ag1–C143      | 2.549(7)   |
| Ag1–P6        | 2.490(2)   | Ag1–P1        | 2.5038(19) |
| Ag2–C171      | 2.510(7)   | Ag3–C115      | 2.450(8)   |
| Ag2–P4        | 2.476(2)   | Ag2–P5        | 2.467(2)   |
| Ag3–P2        | 2.4709(18) | Ag3–P3        | 2.447(2)   |
| Cu1–C89       | 1.952(8)   | Cu1–C199      | 1.947(8)   |
| Cu1–N3        | 2.057(6)   | Cu2–N1        | 2.063(5)   |
| Cu2–C115      | 1.958(8)   | Cu2–C143      | 1.960(8)   |
| Cu3–C171      | 1.976(7)   | Cu3–C227      | 1.962(7)   |
| Cu3–N2        | 2.073(6)   | Cu4–C89       | 2.063(8)   |
| Cu4–C115      | 2.094(7)   | Cu4–C171      | 2.074(7)   |
| Cu5–C143      | 2.083(7)   | Cu5–C199      | 2.040(7)   |
| Cu5–C227      | 2.073(8)   |               |            |
| P6–Ag1–P1     | 118.04(7)  | P1–Ag1–C143   | 92.93(16)  |
| P6–Ag1–C143   | 123.28(18) | P6–Ag1–C89    | 89.51(17)  |
| P1–Ag1–C89    | 116.81(16) | C143–Ag1–C89  | 118.8(2)   |
| P5–Ag2–P4     | 119.78(6)  | P5–Ag2–C171   | 118.00(18) |
| P4–Ag2–C171   | 93.50(18)  | P5–Ag2–C199   | 91.12(17)  |
| P4–Ag2–C199   | 120.80(19) | C171–Ag2–C199 | 116.0(2)   |
| P3–Ag3–C115   | 119.0(2)   | P3–Ag3–P2     | 120.03(7)  |
| C115–Ag3–P2   | 93.05(16)  | P3–Ag3–C227   | 93.95(18)  |
| C115–Ag3–C227 | 112.7(2)   | P2–Ag3–C227   | 120.04(18) |
| C199–Cu1–C89  | 161.3(3)   | C199–Cu1–N3   | 98.6(3)    |
| C89–Cu1–N3    | 100.0(3)   | C115–Cu2–N1   | 97.6(3)    |
| C115–Cu2–C143 | 160.9(3)   | C143–Cu2–N1   | 101.4(3)   |
| C227–Cu3–C171 | 161.1(3)   | C227–Cu3–N2   | 97.3(3)    |
| C171–Cu3–N2   | 101.4(3)   | C89–Cu4–C171  | 111.8(3)   |
| C89–Cu4–C115  | 121.5(3)   | C171–Cu4–C115 | 115.5(3)   |
| C199–Cu5–C227 | 120.1(3)   | C199–Cu5–C143 | 114.0(3)   |
| C227–Cu5–C143 | 113.2(3)   |               |            |

**Table S3.** The Partial Molecular Orbital Compositions (%) by SCPA Approach and the Absorption Transitions in the Ground State for Ag<sub>3</sub>Cu<sub>5</sub> Cluster Complex in the CH<sub>2</sub>Cl<sub>2</sub> Solution Calculated by TD-DFT Method at the PBE1PBE Level

| orbital | energy (eV) | MO contribution (%) |                 |       |       |
|---------|-------------|---------------------|-----------------|-------|-------|
|         |             | Cu (s/p/d)          | Ag (s/p/d)      | dpppy | ebzcz |
| LUMO+8  | -1.53       | 47.98 (86/13/1)     | 22.05 (81/10/9) | 19.36 | 10.61 |
| LUMO+7  | -1.56       | 43.43 (67/30/3)     | 33.69 (85/10/5) | 20.66 | 2.21  |
| LUMO+1  | -1.83       | 22.42 (39/56/5)     | 43.13 (88/9/3)  | 19.15 | 15.30 |
| LUMO    | -1.94       | 21.01 (23/72/5)     | 46.82 (85/12/3) | 13.97 | 18.20 |
| HOMO    | -5.47       | 35.42 (14/7/79)     | 7.06 (72/6/22)  | 6.78  | 50.75 |
| HOMO-1  | -5.52       | 32.74 (13/5/82)     | 4.27 (54/8/38)  | 8.12  | 54.87 |
| HOMO-2  | -5.62       | 13.27 (35/11/54)    | 3.69 (58/12/29) | 1.18  | 81.86 |
| HOMO-3  | -5.71       | 9.54 (47/13/40)     | 6.70 (69/17/14) | 1.58  | 82.18 |
| HOMO-6  | -5.87       | 34.05 (6/4/89)      | 4.04 (36/17/47) | 7.51  | 54.41 |

| state           | <i>E</i> , nm (eV) | O.S.   | transition (contrib.) | assignment                                                             | measured (nm) |
|-----------------|--------------------|--------|-----------------------|------------------------------------------------------------------------|---------------|
| S <sub>1</sub>  | 444 (2.79)         | 0.0730 | HOMO→LUMO (67%)       | <sup>1</sup> MC/ <sup>1</sup> LMCT/ <sup>1</sup> IL                    | 435           |
|                 |                    |        | HOMO-1→LUMO (11%)     | <sup>1</sup> MC/ <sup>1</sup> LMCT/ <sup>1</sup> IL                    |               |
| S <sub>2</sub>  | 436 (2.85)         | 0.0526 | HOMO-1→LUMO (48%)     | <sup>1</sup> MC/ <sup>1</sup> LMCT/ <sup>1</sup> IL                    |               |
|                 |                    |        | HOMO-6→LUMO (12%)     | <sup>1</sup> MC/ <sup>1</sup> LMCT/ <sup>1</sup> IL                    |               |
| S <sub>3</sub>  | 432 (2.87)         | 0.0664 | HOMO→LUMO+1 (53%)     | <sup>1</sup> MC/ <sup>1</sup> LMCT/ <sup>1</sup> IL/ <sup>1</sup> LLCT |               |
|                 |                    |        | HOMO-1→LUMO+1 (13%)   | <sup>1</sup> MC/ <sup>1</sup> LMCT/ <sup>1</sup> IL/ <sup>1</sup> LLCT |               |
| S <sub>16</sub> | 381 (3.25)         | 0.9183 | HOMO-2→LUMO+1 (18%)   | <sup>1</sup> LMCT/ <sup>1</sup> LLCT/ <sup>1</sup> IL/ <sup>1</sup> MC | 368           |
|                 |                    |        | HOMO-3→LUMO (17%)     | <sup>1</sup> LMCT/ <sup>1</sup> IL/ <sup>1</sup> LLCT                  |               |
| S <sub>26</sub> | 363 (3.41)         | 0.3998 | HOMO-1→LUMO+8 (19%)   | <sup>1</sup> MC/ <sup>1</sup> LMCT/ <sup>1</sup> LLCT/ <sup>1</sup> IL | 350           |
|                 |                    |        | HOMO→LUMO+7 (14%)     | <sup>1</sup> MC/ <sup>1</sup> LMCT/ <sup>1</sup> LLCT                  |               |

**Table S4.** The Partial Molecular Orbital Compositions (%) by SCPA Approach and Emission Transitions in the Lowest-Energy Triplet State for Ag<sub>3</sub>Cu<sub>5</sub> Cluster Complex in the CH<sub>2</sub>Cl<sub>2</sub> Solution Calculated by TD-DFT Method at the PBE1PBE Level.

| orbital | energy (eV) | MO Contribution (%) |                  |       |       |
|---------|-------------|---------------------|------------------|-------|-------|
|         |             | Cu (s/p/d)          | Ag (s/p/d)       | dpppy | ebzcz |
| LUMO    | -2.30       | 20.83 (25/67/8)     | 19.31 (77/12/11) | 53.52 | 6.34  |
| HOMO    | -5.38       | 38.84 (16/6/78)     | 5.70 (70/6/24)   | 8.55  | 46.90 |

| state          | <i>E</i> , nm (eV) | O.S.   | transition (contrib.) | assignment                         | measured (nm) |
|----------------|--------------------|--------|-----------------------|------------------------------------|---------------|
| T <sub>1</sub> | 592 (2.09)         | 0.0000 | HOMO->LUMO (74%)      | <sup>3</sup> LLCT/ <sup>3</sup> MC | 590           |

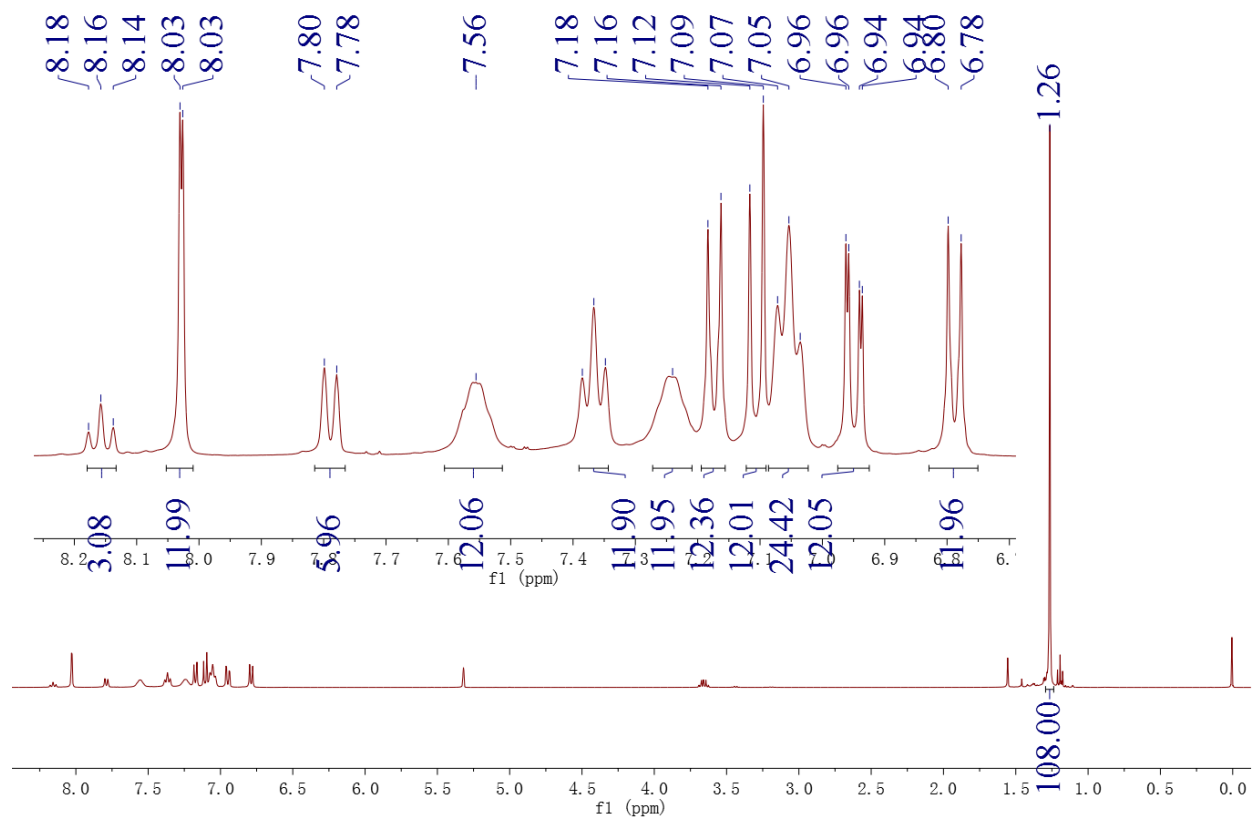

**Fig. S1** The  $^1\text{H}$  NMR spectrum of  $\text{Ag}_3\text{Cu}_5$  cluster compound in  $\text{CD}_2\text{Cl}_2$  solution at ambient temperature.

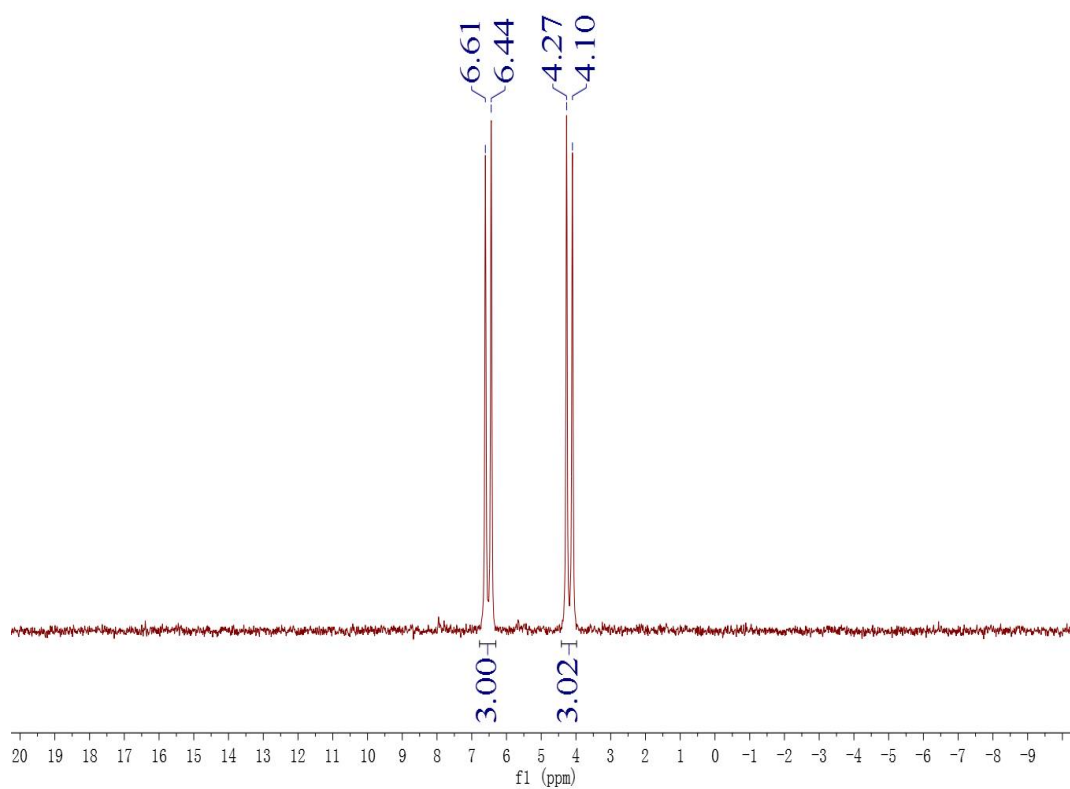

**Fig. S2** The  $^{31}\text{P}$  NMR spectrum of  $\text{Ag}_3\text{Cu}_5$  cluster compound in  $\text{CD}_2\text{Cl}_2$  solution at ambient temperature.

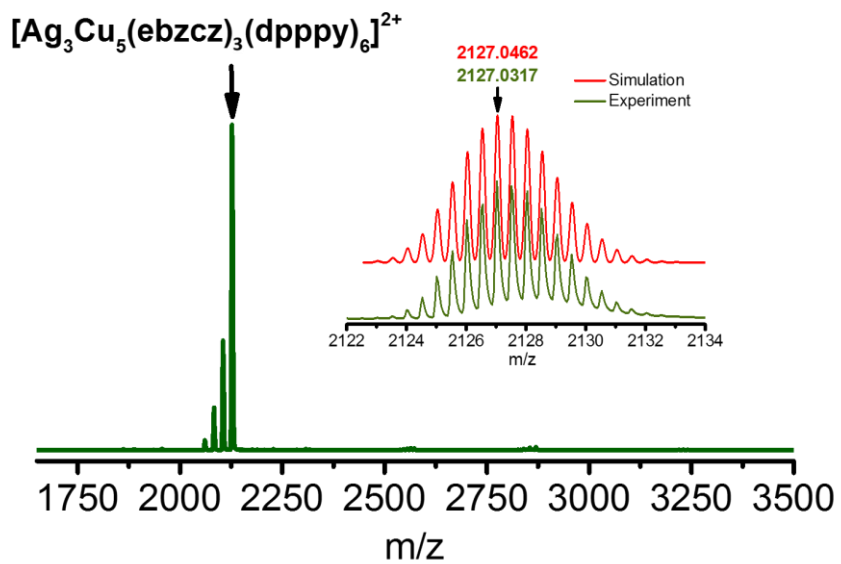

**Fig. S3** The high-resolution mass spectrometry of  $\text{Ag}_3\text{Cu}_5$  cluster compound. Inset: The measured (green) and simulated (red) isotopic patterns.

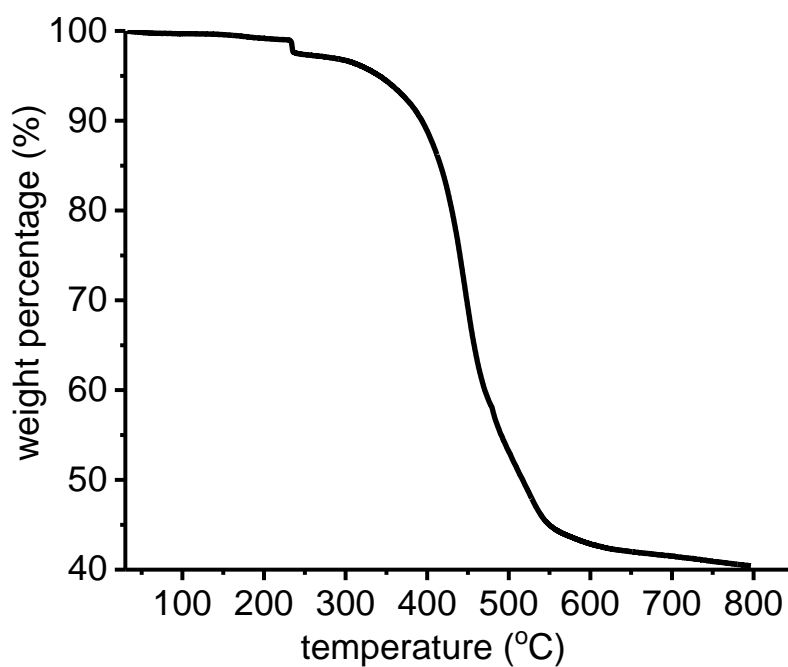

**Fig. S4** The plot of thermogravimetric analysis of  $\text{Ag}_3\text{Cu}_5$  cluster compound.

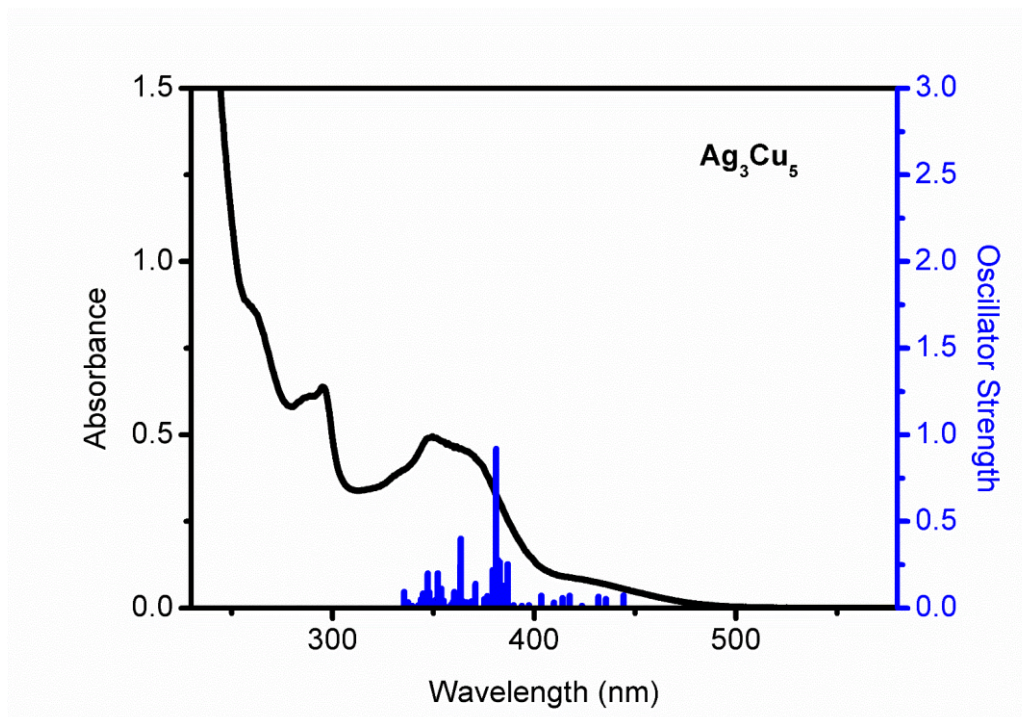

**Fig. S5** The calculated (blue bars) and experimentally measured (black line) absorption spectra of  $\text{Ag}_3\text{Cu}_5$  cluster compound in  $\text{CH}_2\text{Cl}_2$  solution at ambient temperature, calculated by TD-DFT method at the PBE1PBE level.

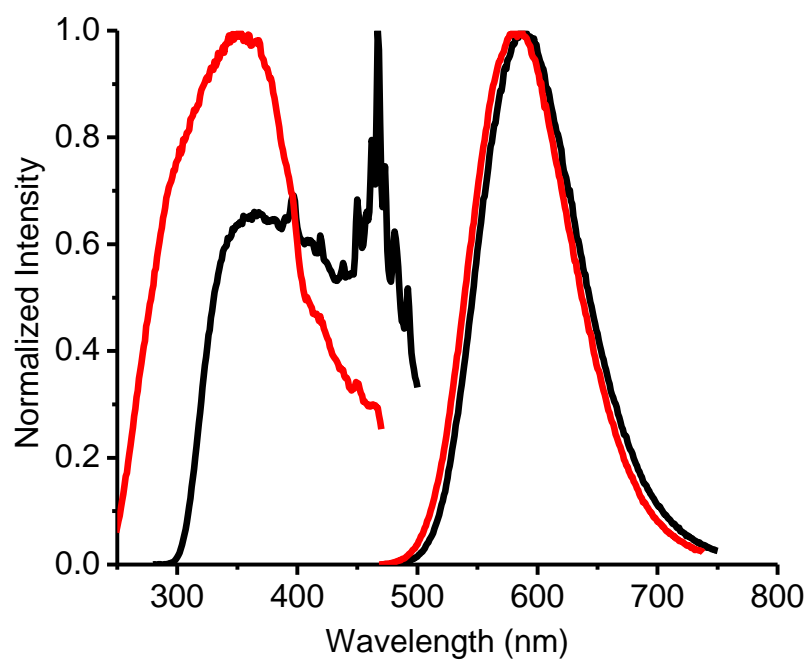

**Fig. S6** The excitation and emission spectra of  $\text{Ag}_3\text{Cu}_5$  cluster compound in solid state (black) and film (red) at room temperature.

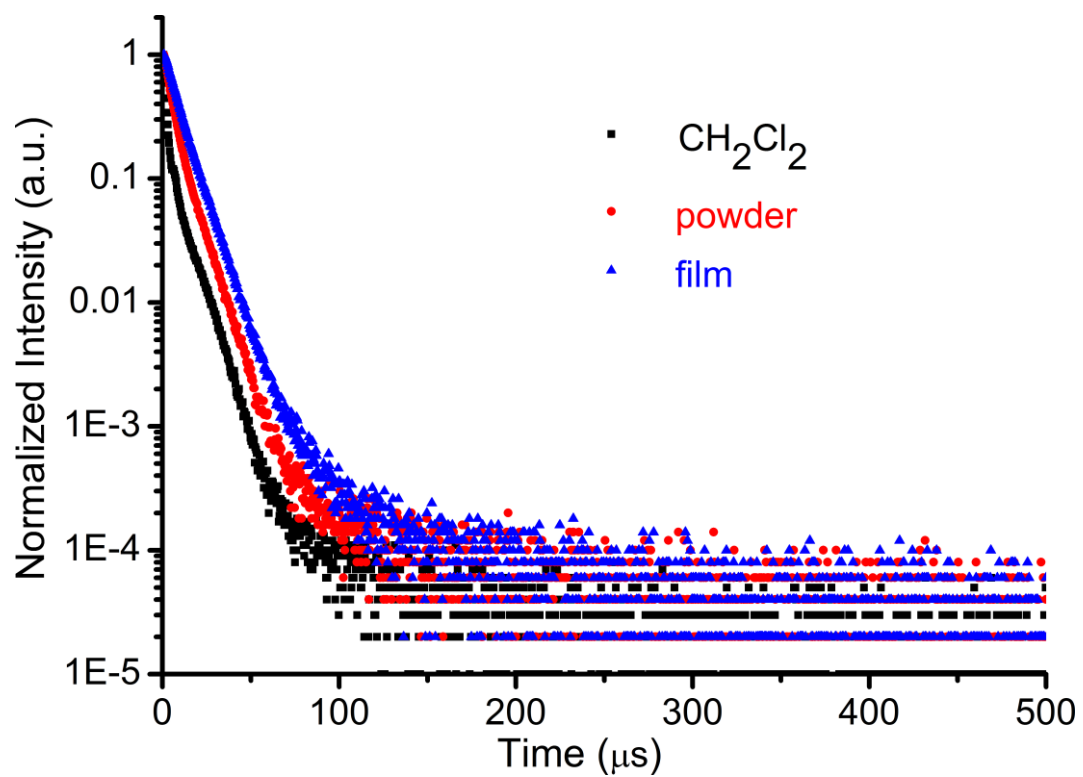

**Fig. S7** The luminescent decay curves of  $\text{Ag}_3\text{Cu}_5$  cluster compound in  $\text{CH}_2\text{Cl}_2$ , powder and film states at room temperature.



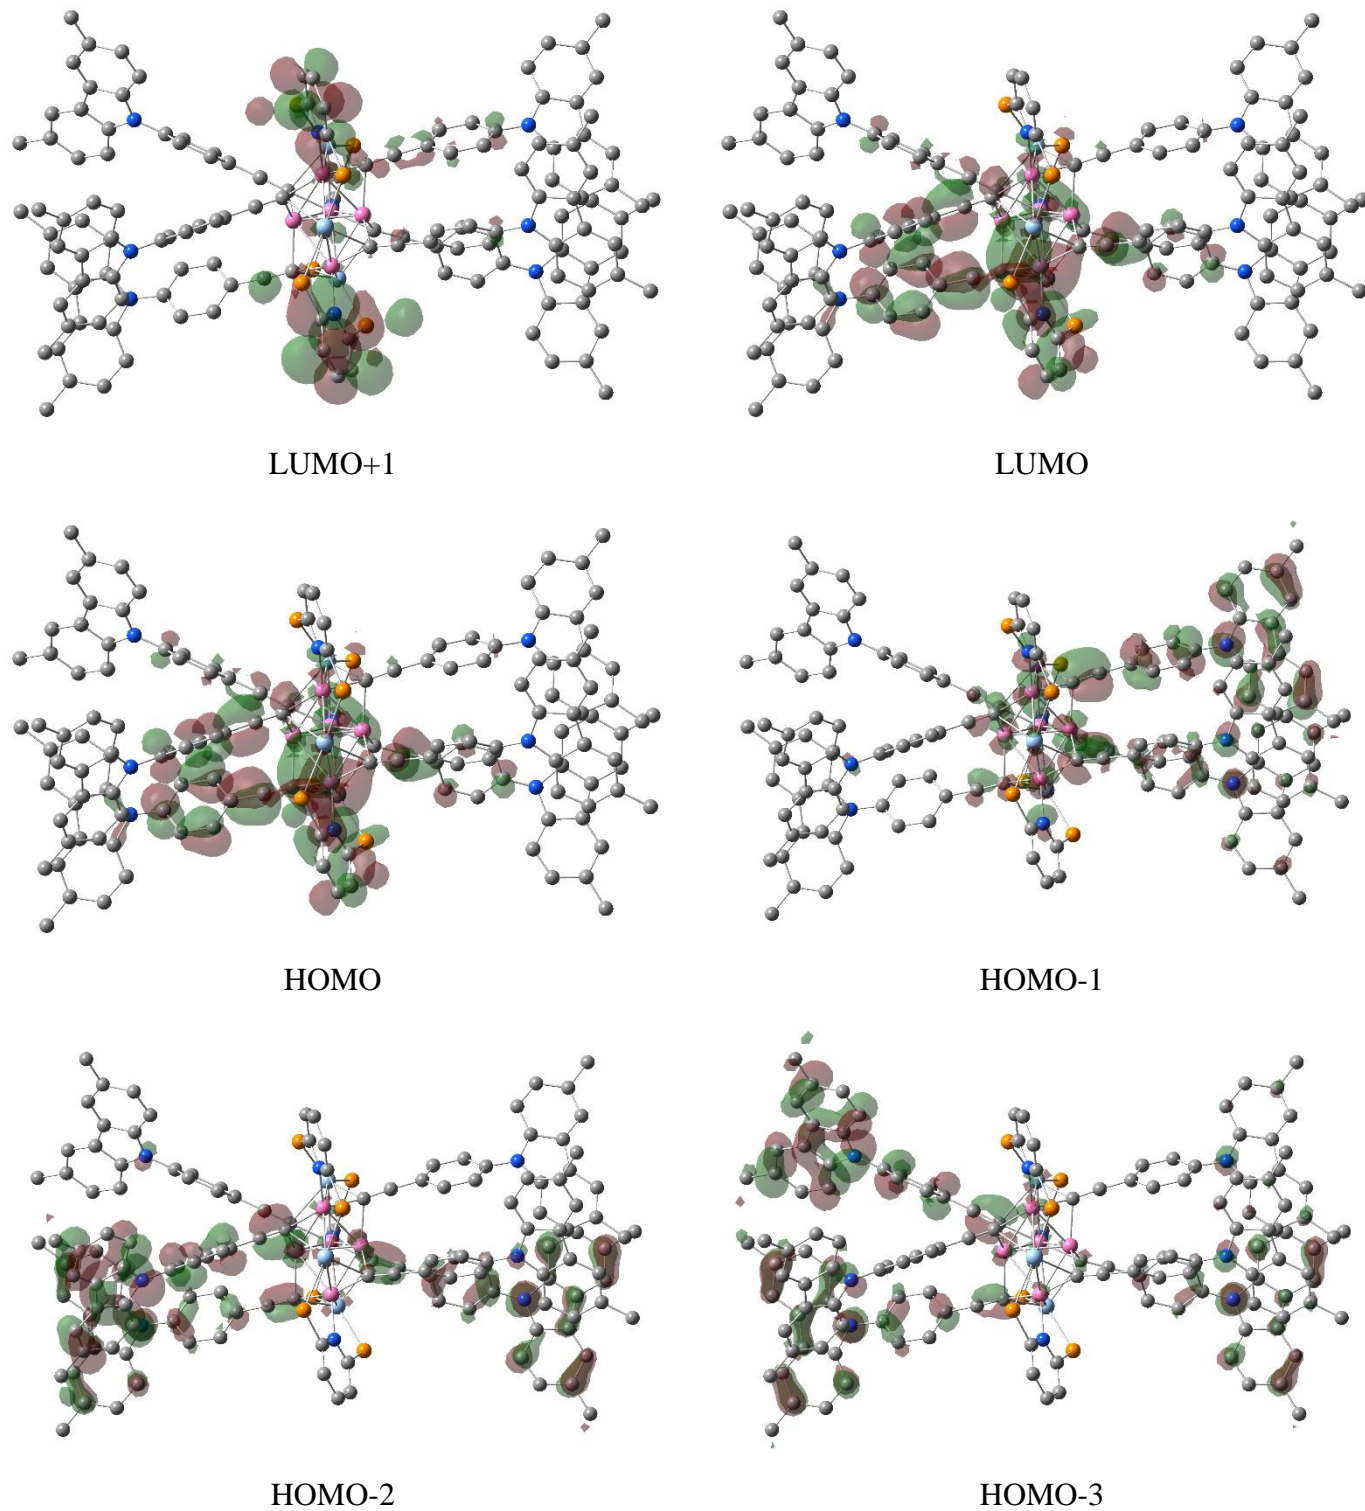

**Fig. S8** Plots of the frontier molecular orbitals involved in the absorption transition (isovalue = 0.02) for  $\text{Ag}_3\text{Cu}_5$  cluster compound by TD-DFT method at the PBE1PBE level.
